# Supplementary material for: The role of unintegrated DNA in HIV infection
Source: Springer Nature journal article supplement (doi:10.1186/1742-4690-8-52), 2011-07-01

linear cDNA



auto-integration

recombination

host DNA repair

integration

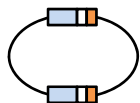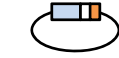

truncated autointegrant

internally rearranged autointegrant

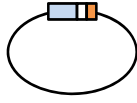

1-LTR circle

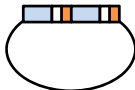

2-LTR circle

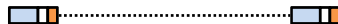

degradation

integrated proviral DNA



Supplement: 12977_2011_2463_MOESM1_ESM.pdf [file 12977_2011_2463_MOESM1_ESM.pdf]
